# Supplementary material for: Discovery of Unique Lanthionine Synthetases Reveals New Mechanistic and Evolutionary Insights
Source: PubMed Central journal article supplement (PMC2843593; doi:10.1371/journal.pbio.1000339), 2010-03-23
Supplement: pbio.1000339.s012.pdf [file pbio.1000339.s012.pdf]

|                                                                                       |               |
|---------------------------------------------------------------------------------------|---------------|
| <i>Bacteria with fully sequenced genomes containing LanB genes used for Figure 6.</i> |               |
| Geobacillus thermodenitrificans NG80-2;                                               | YP_001124395  |
| Streptococcus pyogenes MGAS10750;                                                     | YP_602452     |
| Streptococcus pyogenes MGAS9429;                                                      | YP_596657     |
| Streptococcus pyogenes MGAS10270;                                                     | YP_598531     |
| Streptococcus pyogenes MGAS6180;                                                      | YP_280252     |
| Geobacillus sp. G11MC16;                                                              | ZP_03149197   |
| Clostridium perfringens CPE str. F4969;                                               | ZP_02640727   |
| Bacillus clausii KSM-K16;                                                             | YP_177053     |
| Geobacillus kaustophilus HTA426;                                                      | YP_146153     |
| Anoxybacillus flavithermus WK1;                                                       | YP_002316782  |
| Staphylococcus capitis SK14;                                                          | ZP_03613908   |
| Streptococcus pneumoniae CGSP14;                                                      | YP_001834862  |
| Streptomyces griseus subsp. griseus NBRC 13350;                                       | YP_001827459  |
| Streptococcus thermophilus LMG 18311;                                                 | YP_138642     |
| Streptococcus thermophilus CNRZ1066;                                                  | YP_140529     |
| Staphylococcus aureus subsp. aureus USA300_FPR3757;                                   | YP_494457     |
| Staphylococcus aureus subsp. aureus COL;                                              | YP_186704     |
| Staphylococcus aureus subsp. aureus MW2;                                              | NP_646581     |
| Staphylococcus aureus subsp. aureus MSSA476;                                          | YP_043861     |
| Streptomyces sp. Mg1;                                                                 | ZP_04997226;  |
|                                                                                       | ZP_05001469;  |
|                                                                                       | ZP_04999931   |
| Streptomyces coelicolor A3(2);                                                        | NP_630996;    |
|                                                                                       | NP_624599     |
| Microscilla marina ATCC 23134;                                                        | ZP_01693365;  |
|                                                                                       | ZP_01690534;  |
|                                                                                       | ZP_01689156;  |
|                                                                                       | ZP_01694962   |
| Frankia sp. Eu11c;                                                                    | ZP_06240729   |
| Frankia sp. EAN1pec;                                                                  | YP_001505690; |
|                                                                                       | YP_001507128  |
| Frankia sp. CcI3;                                                                     | YP_482401;    |
|                                                                                       | YP_480236;    |
|                                                                                       | YP_480926;    |
|                                                                                       | YP_481136     |
| Kordia algicida OT-1;                                                                 | ZP_02161440   |
| Streptomyces clavuligerus ATCC 27064;                                                 | ZP_05005990;  |
|                                                                                       | ZP_05003917   |
| Pedobacter heparinus DSM 2366;                                                        | YP_003090841  |

*Other LanB genes used for Figure 6 that are from partially sequenced genomes and from bacteria producing known lantibiotics (shown in parentheses)*

|                                              |               |
|----------------------------------------------|---------------|
| Streptococcus pyogenes MGA2096;              | YP_600477     |
| Staphylococcus gallinarum 3928 (gallidermin) | GdmB ABC94903 |
| Streptomyces noursei ATCC 11455;             | AAX37279      |

|                                                 |                |
|-------------------------------------------------|----------------|
| Streptomyces ambofaciens ATCC 23877;            | CAJ88053       |
| Lactococcus lactis 6F3; (nisin)                 | NisB CAA48381  |
| Streptococcus uberis strain 42; (nisin U)       | NsuB ABA00879  |
| Bacillus subtilis ATCC 6633; (subtilin)         | SpaB AAB91586  |
| Streptococcus mutans CH43/UA140; (mutacin I)    | MutB AAG48566  |
| Staphylococcus epidermidis; Tu 3298 (epidermin) | EpiB CAA44253; |
| Staphylococcus epidermidis strain 5             | PepB CAA90025  |

*Bacteria with fully sequenced genomes containing LanM genes (known lantibiotics in parentheses)*

|                                                          |               |
|----------------------------------------------------------|---------------|
| Anaerocellum thermophilum DSM 6725;                      | YP_002572981  |
| Bacillus cereus ATCC 4342;                               | ZP_04287168;  |
|                                                          | ZP_04287189   |
| Bacillus cereus Rock1-3;                                 | ZP_04248715   |
| Bacillus cereus Q1;                                      | YP_002532646  |
| Bacillus cereus F65185;                                  | ZP_04206897;  |
|                                                          | ZP_04204173   |
| Bacillus cereus 172560W;                                 | ZP_04309311   |
| Bacillus cereus Rock3-29;                                | ZP_04231453   |
| Bacillus cereus AH621;                                   | ZP_04298130   |
| Bacillus cereus AH1272;                                  | ZP_04183889   |
| Bacillus licheniformis ATCC 14580/DSM-13; (lichenicidin) | YP_093632;    |
|                                                          | YP_081203;    |
|                                                          | YP_081205     |
| Herpetosiphon tiacus ATCC 23779;                         | YP_001544639; |
|                                                          | YP_001546502  |
| Bacillus halodurans C-125; (haloduracin)                 | NP_241321;    |
|                                                          | NP_241318     |
| Enterococcus faecalis ATCC 4200;                         | ZP_05474920   |
| Geobacillus sp. G11MC16;                                 | ZP_03149642   |
| Cyanothece sp. PCC 7425;                                 | YP_002485891; |
|                                                          | YP_002483742; |
|                                                          | YP_002484655; |
|                                                          | YP_002483601  |
| Cyanothece sp. PCC 8802;                                 | YP_003137732  |
| Cyanothece sp. PCC 8801;                                 | YP_002372173  |
| Microcoleus chthonoplastes PCC 7420;                     | ZP_05025883   |
| Geobacillus thermodenitrificans NG80-2;                  | YP_001126159  |
| Streptococcus pyogenes MGAS315;                          | NP_665455     |
| Streptococcus pyogenes MGAS10750;                        | YP_603221     |
| Nostoc punctiforme PCC 73102;                            | YP_001866693; |
|                                                          | YP_001869999; |
|                                                          | YP_001868329; |
|                                                          | YP_001866601  |
| Nostoc sp. PCC 7120;                                     | NP_486065     |
| Anabaena variabilis ATCC 29413;                          | YP_320138     |
| Streptococcus pneumoniae ATCC 700669;                    | YP_002511204  |
| Streptococcus pneumoniae SP23-BS72;                      | ZP_01834975   |
| Streptococcus pneumoniae R6;                             | NP_359359     |

|                                               |              |
|-----------------------------------------------|--------------|
| Streptococcus pneumoniae CDC0288-04;          | ZP_02716217  |
| Streptococcus pneumoniae TIGR4;               | NP_346378    |
| Streptococcus pneumoniae ATCC 700669;         | YP_002511832 |
| Ruminococcus sp. 5_1_39B_FAA;                 | ZP_04857854  |
| Ruminococcus flavefaciens FD-1;               | ZP_06143781; |
|                                               | ZP_06143782  |
| Synechococcus sp. RS9916;                     | ZP_01470939  |
| Myxococcus xanthus DK 1622;                   | YP_631068;   |
|                                               | YP_634512    |
| Stigmatella aurantiaca DW4/3-1;               | ZP_01460524  |
| Staphylococcus warneri ISK-1; (nukacin ISK-1) | NP_940773    |
| Streptococcus mutans NN2025                   | BAH87352;    |
| Coxiella burnetii Dugway 5J108-111;           | YP_001424603 |
| Coxiella burnetii 'MSU Goat Q177';            | ZP_01946732  |
| Coxiella burnetii CbuG_Q212;                  | YP_002303280 |

*Other LanM genes used for Figure 6 that are from partially sequenced genomes or from bacterial strains producing known lantibiotics (given in parentheses)*

|                                                        |                  |
|--------------------------------------------------------|------------------|
| Streptomyces cinnamoneus;                              | CAD60521         |
| Streptococcus macedonicus; (macedocin)                 | McdM ABI30229    |
| Streptococcus mutans T8; (mutacin II)                  | MutM AAC38145;   |
| Streptococcus mutans (mutacin K8)                      | MukM ABK59358;   |
| Streptococcus mutans GS5 (Smb)                         | BAD72771         |
| Streptococcus pneumoniae CDC1873-00;                   | CylM ZP_02709201 |
| Streptococcus ratti; (BHT)                             | BhtM1 AAZ76597   |
| Streptococcus pyogenes FF22; (Streptococcin A-FF22)    | ScnM AAB92602    |
| Bacillus sp. HIL-Y85/54728; (mersacidin)               | MrsM CAB60261    |
| Lactococcus lactis subsp. lactis C2102; (lacticin 481) | LctM P37609      |
| Ruminococcus gnavus E1 (ruminococcin)                  | RumM CAB93674;   |
|                                                        | AAK73192         |
| Streptococcus salivarius K12; (salivaricins)           | SivM ABI54435;   |
|                                                        | SivM ACX68644;   |
|                                                        | SboM ABI63640;   |
|                                                        | SalM ABI63629    |

*Bacterial strains containing LanL genes*

|                                                           |               |
|-----------------------------------------------------------|---------------|
| Streptomyces clavuligerus ATCC 27064;                     | YP_002193147  |
| Saccharopolyspora erythraea NRRL 2338;                    | YP_001106221; |
|                                                           | YP_001106807  |
| Streptomyces griseus subsp. griseus NBRC 13350;           | YP_001821664  |
| Catenulispora acidiphila DSM 44928;                       | ZP_04369540   |
| Stackebrandtia nassauensis DSM 44728;                     | ZP_04482848   |
| Thermomonospora curvata DSM 43183;                        | ZP_04030721   |
| Streptococcus pneumoniae CDC1087-00;                      | ZP_02710581   |
| Streptomyces griseochromogenes (partial genome sequenced) | AAP03109      |
