# Supplementary material for: Discovery of Unique Lanthionine Synthetases Reveals New Mechanistic and Evolutionary Insights
Source: PLoS Biol. 2010 Mar 23;8(3):e1000339. doi: 10.1371/journal.pbio.1000339 (PMC2843593; doi:10.1371/journal.pbio.1000339)
Supplement: Table S4 — Species and strains with genes for more than one pathway to lanthionine-containing peptides. Figure 6 in the main text shows species with genes for more than one pathway to lanthionine-containing peptides. In some cases, these genes are found in one strain; in other cases, the genes are found in different strains. For accession numbers, see Table S3. (0.01 MB PDF) [file pbio.1000339.s013.pdf]

*Multiple lanthionine biosynthetic genes from different pathways found in a single strain*

|                                                 |               |
|-------------------------------------------------|---------------|
| Streptomyces griseus subsp. griseus NBRC 13350; | LanB and LanL |
| Streptomyces clavuligerus ATCC 27064;           | LanB and LanL |
| Geobacillus thermodenitrificans NG80-2;         | LanB and LanM |
| Bacillus halodurans C-125;                      | LanM and LanB |
| Streptococcus pyogenes MGAS10750;               | LanM and LanB |

*Examples of lanthionine biosynthetic genes for different pathways found in different strains in a species*

|                                        |       |
|----------------------------------------|-------|
| Streptococcus pneumoniae CDC1087-00;   | LanL  |
| Streptococcus pneumoniae ATCC 700669;  | LanMs |
| Streptococcus pneumoniae CGSP14;       | LanB  |
| Lactococcus lactis subsp. lactis C2102 | LanM  |
| Lactococcus lactis subsp. lactis 6F3   | LanB  |

NOTE: in cases where the genome of the strain has not been fully sequenced, the current information is necessarily incomplete and multiple pathways could be present.
